# Supplementary material
Source: HighWire-hosted journal article supplement (https://rmdopen.bmj.com/content/9/2/e002995)
Supplement: inline-supplementary-material-1 [file inline-supplementary-material-1.pdf]

**Supplementary table 1. Radiograph data availability**

| Year     | # patients in study | # radiographs | % missing radiographs |
|----------|---------------------|---------------|-----------------------|
| Baseline | 508                 | 476           | 6,3%                  |
| 1        | 483                 | 445           | 7,9%                  |
| 2        | 471                 | 438           | 7,0%                  |
| 3        | 435                 | 413           | 5,1%                  |
| 4        | 417                 | 397           | 4,8%                  |
| 5        | 417                 | 373           | 10,6%                 |
| 6        | 379                 | 327           | 13,7%                 |
| 7        | 354                 | 319           | 9,9%                  |
| 8        | 343                 | 306           | 10,8%                 |
