# Supplementary material
Source: HighWire-hosted journal article supplement (https://rmdopen.bmj.com/content/9/2/e002995)
Supplement: inline-supplementary-material-2 [file inline-supplementary-material-2.pdf]

**Supplementary table 2. Details of joints per patient with repair.**

| Patient nr.                    | 1    | 2     | 3    | 4    | 5    | 6     | 7      | 8      | 9    | 10    | 11     | 12   | 13    | 14    | 15     | 16     | 17    |
|--------------------------------|------|-------|------|------|------|-------|--------|--------|------|-------|--------|------|-------|-------|--------|--------|-------|
| Repair site 1 <sup>□</sup>     | SCL  | MTP1L | STRL | RSR  | IPPR | MCP2R | MCP2DL | MTP5PR | STRR | MTP4R | MCP2PL | IPPL | MCP2R | MTP5L | MTP4PL | MTP1PL | MCP2L |
| Repair time point <sup>#</sup> | 1    | 6     | 3    | 2    | 3    | 1     | 4      | 5      | 1    | 5     | 4      | 1    | 4     | 5     | 2      | 5      | 3     |
| Repair type                    | JSN  | JSN   | JSN  | JSN  | ERO  | JSN   | ERO    | ERO    | JSN  | JSN   | ERO    | ERO  | JSN   | JSN   | ERO    | ERO    | JSN   |
| Local SHS                      | 0    | 0     | 1.5  | 0    | 0    | 1.25  | 0      | 2.25   | 0    | 1     | 1.25   | 0    | 0     | 1     | 0.25   | 0      | 0     |
| Local SHS (previous*)          | 0.75 | 0.75  | 2    | 1.25 | 0.75 | 2.5   | 0.75   | 2.75   | 1.5  | 2.25  | 2.5    | 0.75 | 0.5   | 2.75  | 0.75   | 1.25   | 2     |
| Total SHS                      | 4.5  | 0.5   | 9.75 | 5    | 0.75 | 17.75 | 70.75  | 230.75 | 1    | 23.75 | 31     | 0    | 9.25  | 20.75 | 18.25  | 2      | 0     |
| Total SHS (previous*)          | 5.25 | 1.25  | 9.5  | 6.25 | 2.75 | 19.25 | 54.75  | 219    | 2.5  | 22.75 | 28.25  | 0.75 | 9.5   | 24.5  | 19.5   | 6.25   | 2     |
| Local clinical evaluation**    | NE   | NE    | T    | N    | N    | N     | N      | N      | N    | T     | N      | N    | N     | N     | N      | N      | NE    |
| Repair site 2                  | -    | -     | -    | RSL  | -    | -     | -      | -      | -    | MTP5R | -      | -    | -     | MTP5R | -      | -      | -     |
| Repair time point <sup>#</sup> | -    | -     | -    | 3    | -    | -     | -      | -      | -    | 5     | -      | -    | -     | 5     | -      | -      | -     |
| Repair type                    | -    | -     | -    | JSN  | -    | -     | -      | -      | -    | JSN   | -      | -    | -     | JSN   | -      | -      | -     |
| Local SHS                      | -    | -     | -    | 0.5  | -    | -     | -      | -      | -    | 0     | -      | -    | -     | 1.25  | -      | -      | -     |
| Local SHS (previous*)          | -    | -     | -    | 1.5  | -    | -     | -      | -      | -    | 1.75  | -      | -    | -     | 3.25  | -      | -      | -     |
| Total SHS                      | -    | -     | -    | 4.25 | -    | -     | -      | -      | -    | 23.75 | -      | -    | -     | 20.75 | -      | -      | -     |
| Total SHS (previous*)          | -    | -     | -    | 5    | -    | -     | -      | -      | -    | 22.75 | -      | -    | -     | 24.5  | -      | -      | -     |
| Local clinical evaluation**    | -    | -     | -    | N    | -    | -     | -      | -      | -    | N     | -      | -    | -     | N     | -      | -      | -     |
| DAS (time point repair site 1) | -    | -     | 3.86 | 0.74 | 3.22 | 2.45  | 1.94   | 3.32   | 3.15 | 2.96  | 0.47   | 1.27 | 1.92  | 1.78  | 1.64   | 1.12   | -     |
| Mean DAS <sup>‡</sup>          | 2.98 | 1.13  | 3.39 | 1.30 | 2.38 | 3.14  | 2.06   | 3.59   | 2.90 | 2.63  | 2.05   | 1.10 | 2.31  | 2.56  | 2.06   | 1.76   | 1.23  |

DAS: Disease Activity Score, ERO: erosion repair, IPP: proximal part of first interphalangeal joint in the foot, JSN: repair of joint space narrowing, MCP: metacarpophalangeal, MTP: metatarsophalangeal,

N: normal clinical evaluation, NE: not evaluated, T: tenderness on clinical evaluation, RS: radioscaphoid, SC: scaphocapitate, SHS: Sharp/van der Heijde score, STR: scaphotrapezial

□: Additional D or P in joints with erosion repair: distal or proximal part of the joint, Additional L or R: left or right joint.

#: time point of repair, in years after randomisation

\*\* local clinical evaluation: presence of joint swelling and/or joint tenderness

\* previous: at the time point before repair

‡ mean DAS: mean of DAS measurements from month 3 to time of repair
